# Supplementary material for: Room-Temperature Eutectic Synthesis for Upcycling of Cathode Materials
Source: MDPI journal article supplement (doi:10.3390/batteries9100498), 2023-09-28
Supplement: s1 [file s1]

Supporting Information

## Room-Temperature Eutectic Synthesis for Upcycling of Cathode Materials

W. Blake Hawley<sup>1,2</sup>, Mengya Li<sup>1</sup>, Jianlin Li<sup>1\*</sup>

<sup>1</sup>Electrification and Energy Infrastructures Division, Oak Ridge National Laboratory, Oak Ridge,

TN, USA 37831

<sup>2</sup>University of Tennessee, Bredesen Center for Interdisciplinary Research and Graduate

Education, Knoxville, TN, USA 37996

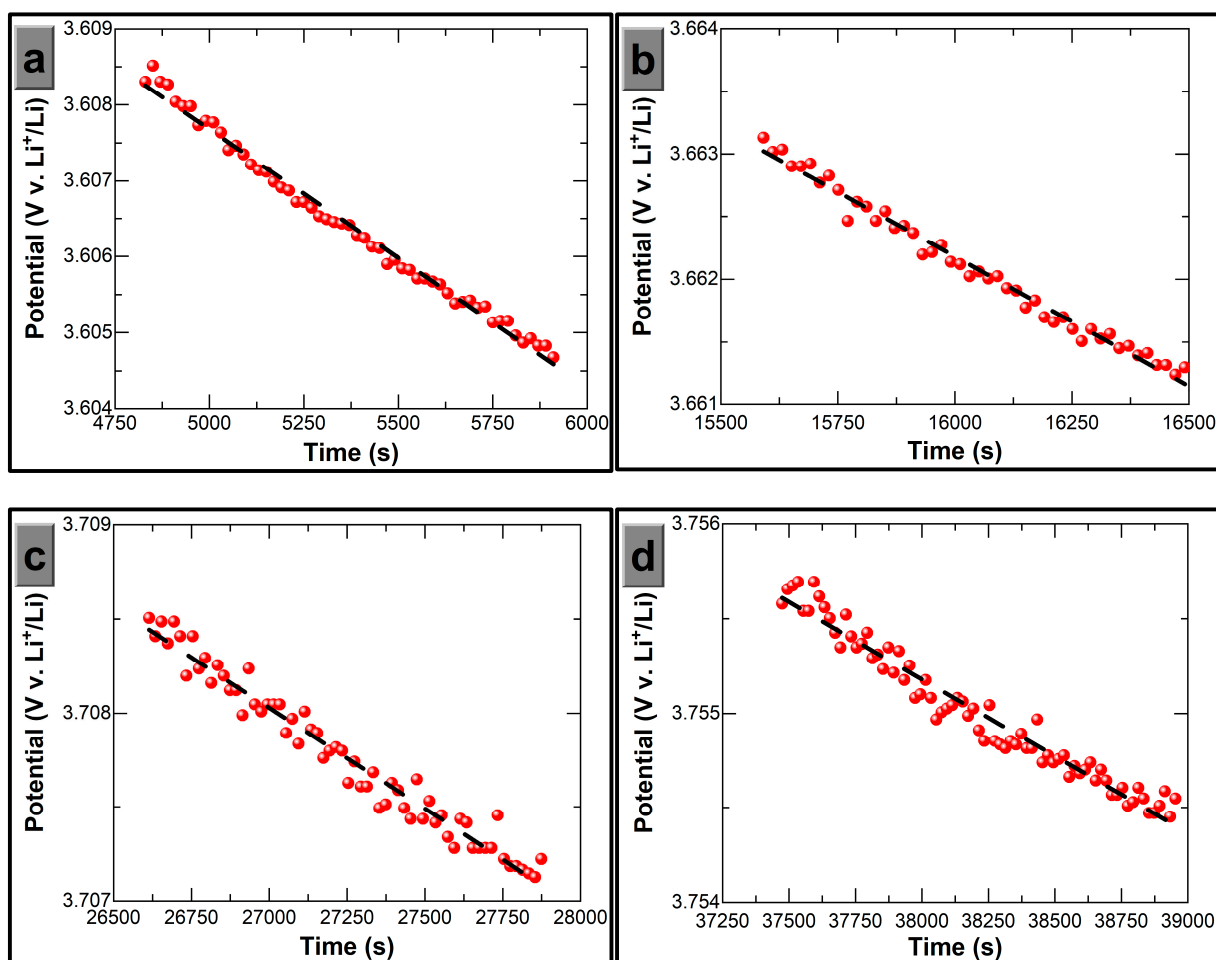

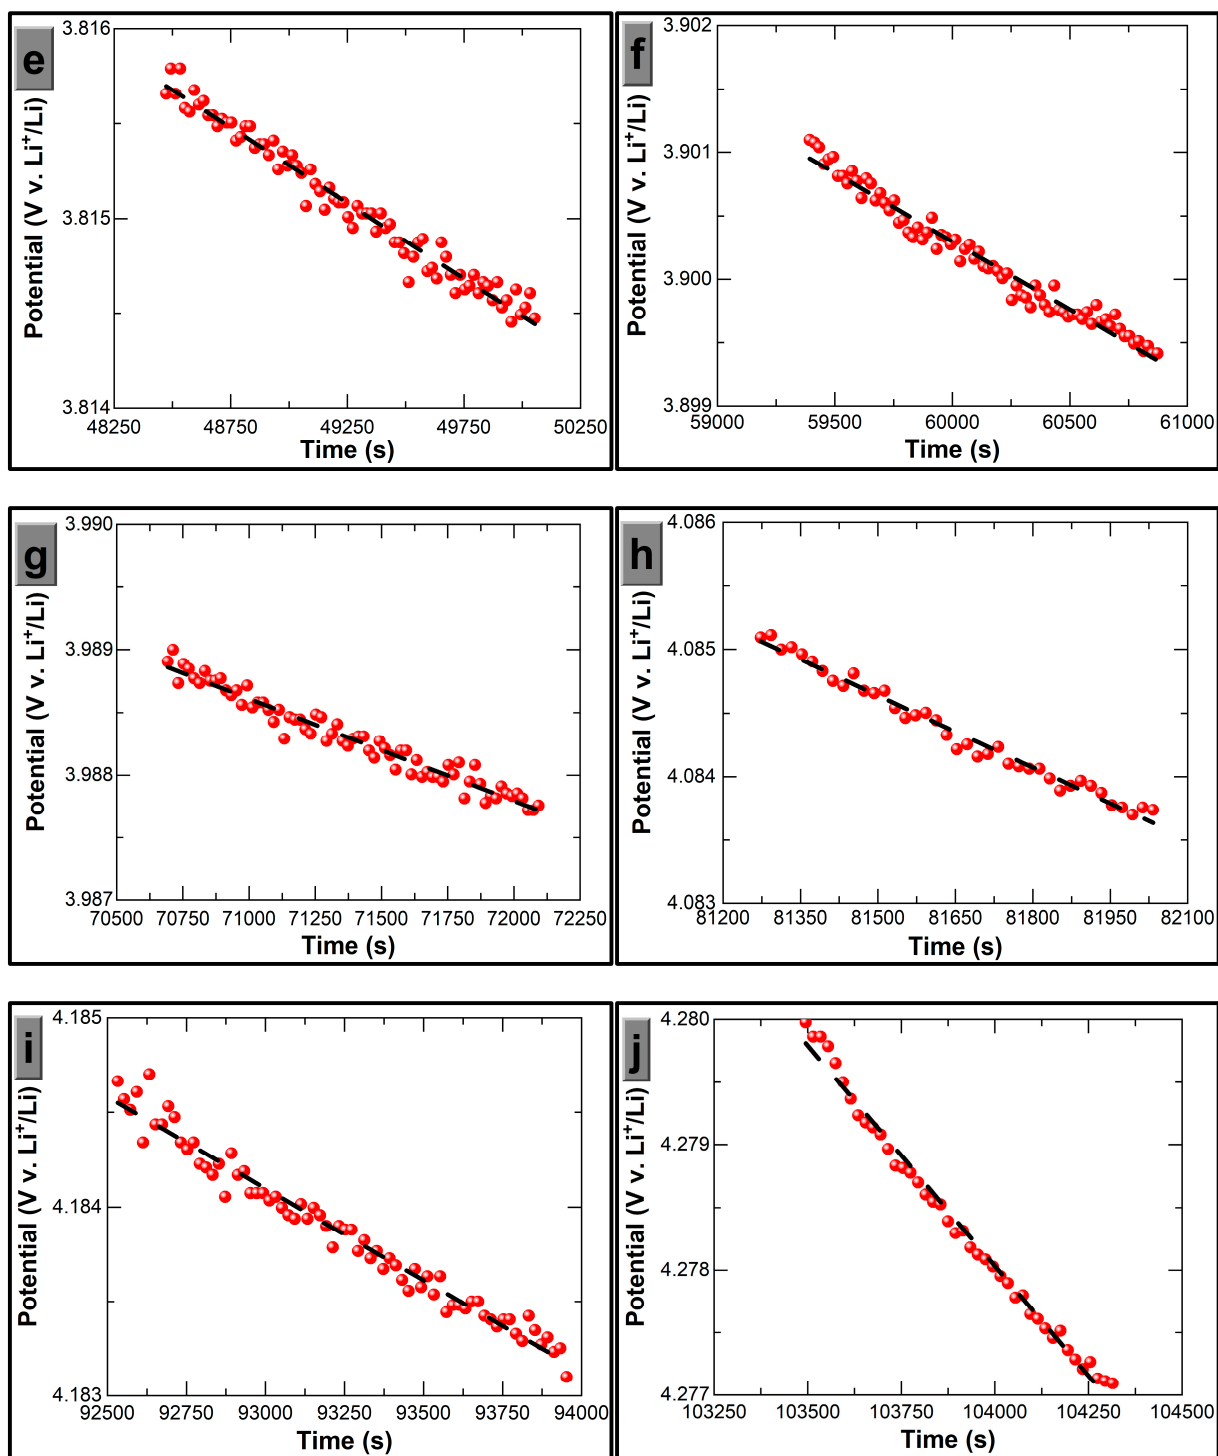

Fig. S1. The potential vs. time plots for the ten rest periods, executed at: a) 10% SOC, b) 20% SOC, c) 30% SOC, d) 40% SOC, e) 50% SOC, f) 60% SOC, g) 70% SOC, h) 80% SOC, i) 90%

SOC, and j) 100% SOC. The time represents the total time of the charge/discharge cycle. The dashed black line represents the linear fit of the raw data shown with the red data points.

Table S1. A summary of the data from the charge step of the GITT protocol.

| SOC (%) | Slope                | Diffusion Coefficient ( $\text{cm}^2 \cdot \text{s}^{-1}$ ) | Potential (V vs. $\text{Li}^+/\text{Li}$ ) |
|---------|----------------------|-------------------------------------------------------------|--------------------------------------------|
| 10      | $3.39 \cdot 10^{-6}$ | $4.99 \cdot 10^{-13}$                                       | 3.63                                       |
| 20      | $2.06 \cdot 10^{-6}$ | $3.03 \cdot 10^{-13}$                                       | 3.67                                       |
| 30      | $1.08 \cdot 10^{-6}$ | $1.59 \cdot 10^{-13}$                                       | 3.71                                       |
| 40      | $8.20 \cdot 10^{-7}$ | $1.21 \cdot 10^{-13}$                                       | 3.76                                       |
| 50      | $7.90 \cdot 10^{-7}$ | $1.16 \cdot 10^{-13}$                                       | 3.82                                       |
| 60      | $1.07 \cdot 10^{-6}$ | $1.58 \cdot 10^{-13}$                                       | 3.90                                       |
| 70      | $8.10 \cdot 10^{-7}$ | $1.19 \cdot 10^{-13}$                                       | 3.99                                       |
| 80      | $1.88 \cdot 10^{-6}$ | $2.77 \cdot 10^{-13}$                                       | 4.09                                       |
| 90      | $9.70 \cdot 10^{-7}$ | $1.43 \cdot 10^{-13}$                                       | 4.18                                       |
| 100     | $3.52 \cdot 10^{-6}$ | $5.18 \cdot 10^{-13}$                                       | 4.30                                       |

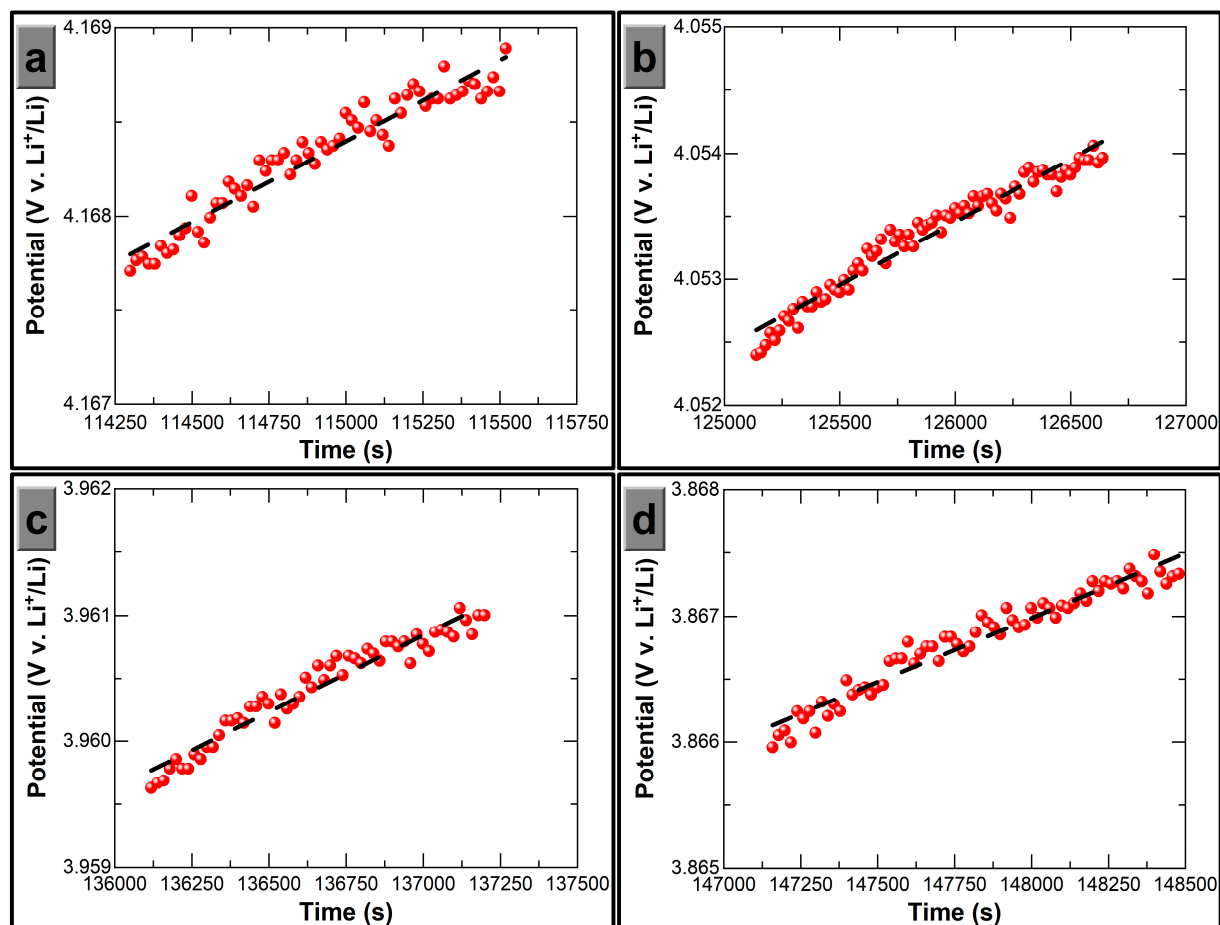

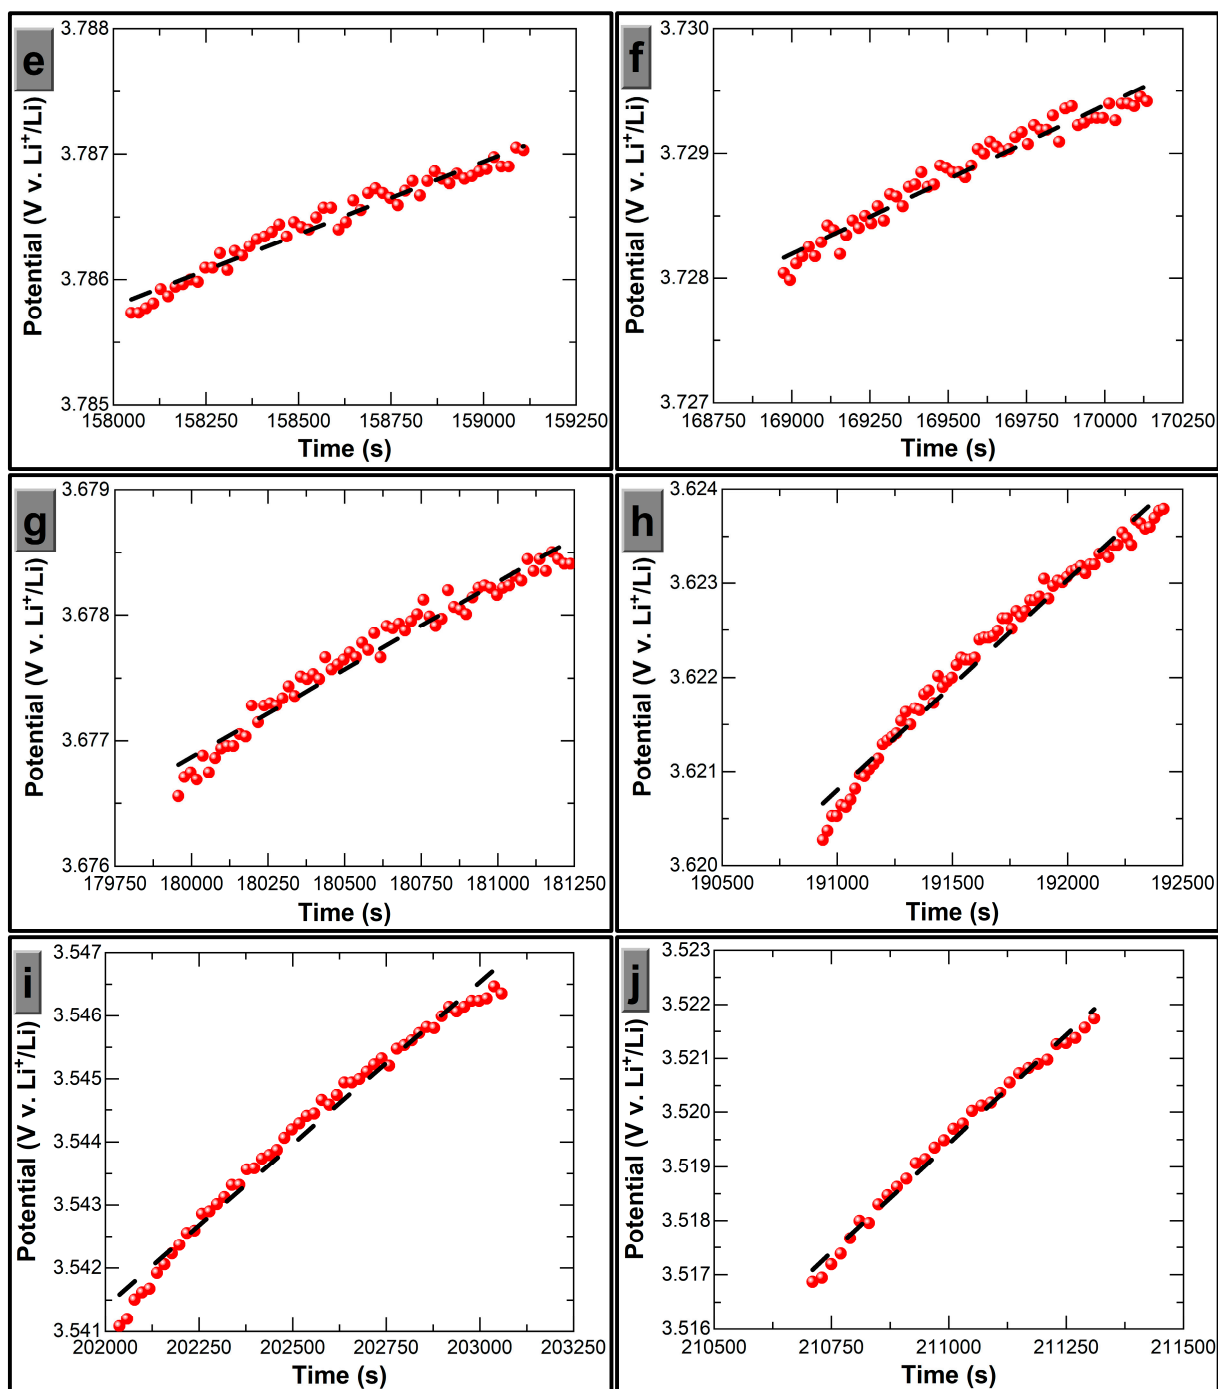

Fig. S2. The potential vs. time plots for the ten rest periods, executed at: a) 10% DOD, b) 20% DOD, c) 30% DOD, d) 40% DOD, e) 50% DOD, f) 60% DOD, g) 70% DOD, h) 80% DOD, i) 90% DOD, and j) 100% DOD. The time represents the total time of the charge/discharge cycle.

The dashed black line represents the linear fit of the raw data shown with the red data points.

Table S2. A summary of the data from the discharge step of the GITT protocol.

| DOD (%) | Slope                | Diffusion Coefficient ( $\text{cm}^2 \cdot \text{s}^{-1}$ ) | Potential (V vs. $\text{Li}^+/\text{Li}$ ) |
|---------|----------------------|-------------------------------------------------------------|--------------------------------------------|
| 10      | $8.60 \cdot 10^{-7}$ | $1.27 \cdot 10^{-13}$                                       | 4.16                                       |
| 20      | $1.00 \cdot 10^{-6}$ | $1.47 \cdot 10^{-13}$                                       | 4.05                                       |
| 30      | $1.22 \cdot 10^{-6}$ | $1.80 \cdot 10^{-13}$                                       | 3.95                                       |
| 40      | $1.02 \cdot 10^{-6}$ | $1.50 \cdot 10^{-13}$                                       | 3.86                                       |
| 50      | $1.15 \cdot 10^{-6}$ | $1.69 \cdot 10^{-13}$                                       | 3.78                                       |
| 60      | $1.19 \cdot 10^{-6}$ | $1.75 \cdot 10^{-13}$                                       | 3.73                                       |
| 70      | $1.40 \cdot 10^{-6}$ | $2.06 \cdot 10^{-13}$                                       | 3.67                                       |
| 80      | $2.24 \cdot 10^{-6}$ | $3.30 \cdot 10^{-13}$                                       | 3.61                                       |
| 90      | $5.15 \cdot 10^{-6}$ | $7.58 \cdot 10^{-13}$                                       | 3.44                                       |
| 100     | $8.05 \cdot 10^{-6}$ | $1.19 \cdot 10^{-12}$                                       | 3.00                                       |

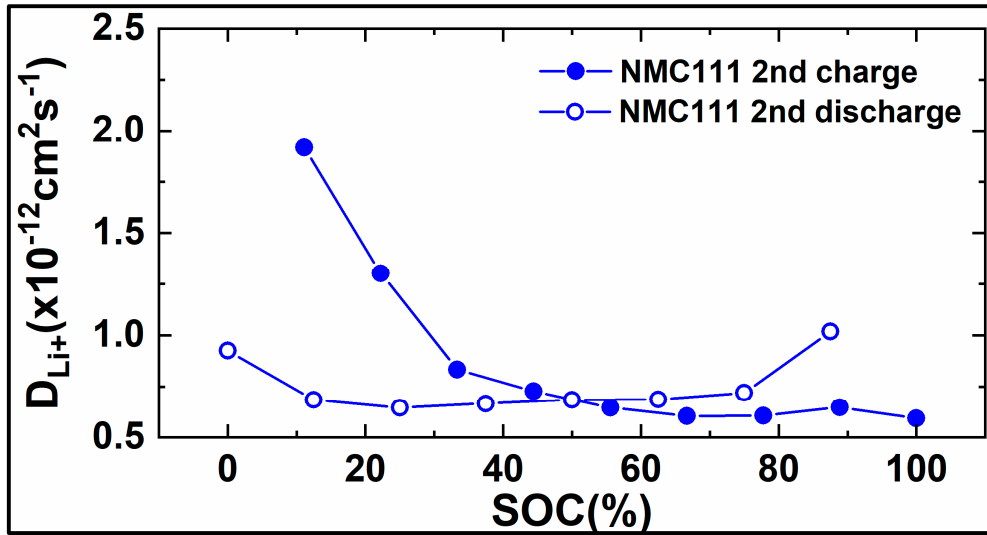

Fig. S3. The diffusion coefficient determined via GITT analysis for the CA-NMC111 material.

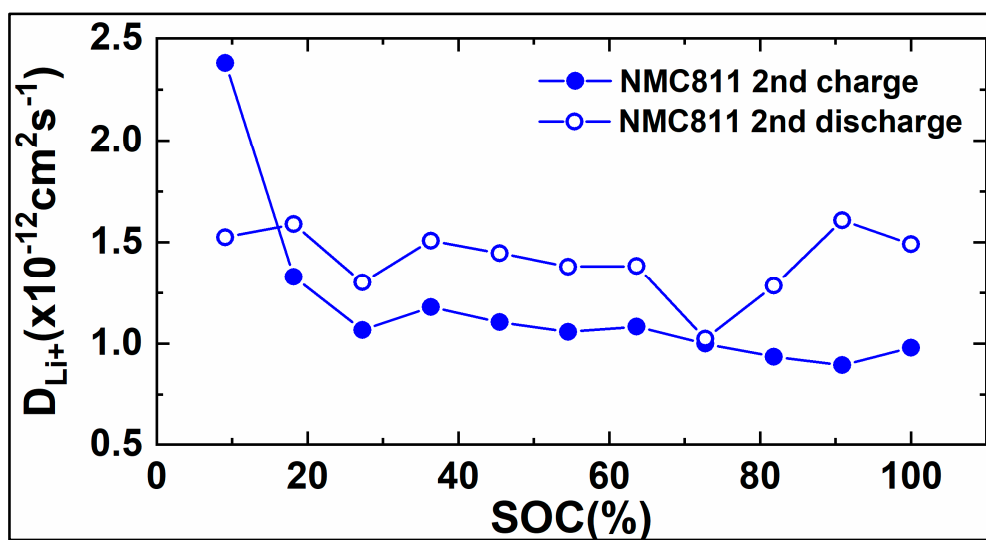

Fig. S4. The diffusion coefficient determined via GITT analysis for the CA-NMC811 material.
